# Supplementary material for: Spectrum and frequencies of BRCA1/2 mutations in Bulgarian high risk breast cancer patients
Source: BMC Cancer. 2015 Jul 17;15:523. doi: 10.1186/s12885-015-1516-2 (PMC4504066; doi:10.1186/s12885-015-1516-2)
Supplement: Additional file 1: Table S1. — Total number of BC patients distributed by criteria. [file 12885_2015_1516_MOESM1_ESM.pdf]

**Additional Table 1. Total number of BC patients distributed by criteria**

| Criteria                                                                                                                                                                                                                                                                                                                                                                                | Number of BC patients |
|-----------------------------------------------------------------------------------------------------------------------------------------------------------------------------------------------------------------------------------------------------------------------------------------------------------------------------------------------------------------------------------------|-----------------------|
| BCLC-1. An affected individual with BC with two first-degree relatives (mother, daughter or sister) of which at least one is diagnosed with BC under the age of 40 or OC at any age.                                                                                                                                                                                                    | 6                     |
| BCLC-2. An affected individual with BC with three or more first-degree or second-degree (grandmother or aunt) relatives diagnosed with BC or OC regardless of their age of diagnosis.                                                                                                                                                                                                   | 31                    |
| BCLC-3. An affected individual with early-age-onset BC diagnosed under the age of 40.                                                                                                                                                                                                                                                                                                   | 55                    |
| BCLC-4. An affected individual with BBC.                                                                                                                                                                                                                                                                                                                                                | 30                    |
| NCCN-1. An affected individual with two or more clearly separate ipsilateral primary tumours, or breast and ovarian/ fallopian tube/ primary peritoneal cancer.                                                                                                                                                                                                                         | 5                     |
| NCCN-2. An affected individual with family history of two or more breast primaries including bilateral disease or two or more clearly separate ipsilateral primary tumours, as well as breast and ovarian/ fallopian tube/ primary peritoneal cancers in close relative(s) from the same side of the family (maternal or paternal).                                                     | 38                    |
| NCCN-3. An affected individual with family history of BC in combination with one or more of the following cancers: thyroid cancer, sarcoma, adrenocortical carcinoma, endometrial cancer, pancreatic cancer, brain tumours, diffuse gastric cancer, dermatological manifestations of the Cowden's syndrome or leukemia/ lymphoma on the same side of the family (maternal or paternal). | 7                     |
| TNBC. An affected individual with TNBC.                                                                                                                                                                                                                                                                                                                                                 | 28                    |
| Total number of patients                                                                                                                                                                                                                                                                                                                                                                | 200                   |
