# Supplementary material for: Spectrum and frequencies of BRCA1/2 mutations in Bulgarian high risk breast cancer patients
Source: Springer Nature journal article supplement (doi:10.1186/s12885-015-1516-2), 2015-07-16
Supplement: MOESM2 [file 9744814]

**Additional Table 2. List of primers sequences used for PCR amplification of the entire exons and exon-intron junctions of the *BRCA1* and *BRCA2* genes**

| Exon         | F/R | Nucleotide sequence of the primers | Size of PCR products | Annealing temperature | Design by        |
|--------------|-----|------------------------------------|----------------------|-----------------------|------------------|
| <b>BRCA1</b> |     |                                    |                      |                       |                  |
| 2            | F   | 5'-GGACGTTGTCATTAGTTCTTTGG-3'      | 339bp                | 56 °C                 | custom<br>bic    |
|              | R   | 5'-GTCTTTTCTTCCCTAGTATGT-3'        |                      |                       |                  |
| 3            | F   | 5'-AACGAACTTGAGGCCTTATG-3'         | 308bp                | 51°C                  | bic<br>bic       |
|              | R   | 5'-TTGGATTTTCGTTCTCACTT-3'         |                      |                       |                  |
| 5            | F   | 5'-CTCTTAAGGGCAGTTGTGAG-3'         | 278bp                | 56 °C                 | bic<br>bic       |
|              | R   | 5'-ATGGTTTTATAGGAACGCTATG-3'       |                      |                       |                  |
| 6            | F   | 5'-TTTCTACTGTTGCTGCATCT-3'         | 273bp                | 58 °C                 | custom<br>custom |
|              | R   | 5'-TAATGTGCAAACTTCTGAG-3'          |                      |                       |                  |
| 7            | F   | 5'-GGTTTCTCTTGGTTTCTTTG-3'         | 250bp                | 57 °C                 | bic<br>custom    |
|              | R   | 5'-CCCAGCTACTAAGGGGGCTA-3'         |                      |                       |                  |
| 8            | F   | 5'-TGTTAGCTGACTGATGATGGT-3'        | 268bp                | 54 °C                 | bic<br>bic       |
|              | R   | 5'-AACCCAGCAATTATTATTAATAAC-3'     |                      |                       |                  |
| 9            | F   | 5'-CCACAGTAGATGCTCAGTAAATA-3'      | 211bp                | 57 °C                 | bic<br>bic       |
|              | R   | 5'-TAGGAAAATACCAGCTTCATAGA-3'      |                      |                       |                  |
| 10           | F   | 5'-GATCTTGGTCATTTGACAGTTC-3'       | 240bp                | 53 °C                 | bic<br>bic       |
|              | R   | 5'-CCCAAATGGTCTTCAGAATA-3'         |                      |                       |                  |
| 11a          | F   | 5'-CCACCTCCAAGGTGTATGA-3'          | 370bp                | 59 °C                 | custom<br>custom |
|              | R   | 5'-TGTTATGTTGGCTCCTTGCT-3'         |                      |                       |                  |
| 11b          | F   | 5'-TACTCACTAAAGACAGAAATGA-3'       | 401bp                | 58 °C                 | custom<br>custom |
|              | R   | 5'-CCAGAATTCATCTACCTCA-3'          |                      |                       |                  |
| 11c          | F   | 5'-CACATGATGGGGAGTCTGA-3'          | 366bp                | 58 °C                 | custom<br>custom |
|              | R   | 5'-TCTTGATAAAAATCCTCAGGATG-3'      |                      |                       |                  |
| 11d          | F   | 5'-CAAGAGCGTCCCCTCACA-3'           | 388bp                | 63 °C                 | custom<br>custom |
|              | R   | 5'-GCGCATGAATATGCCTGGT-3'          |                      |                       |                  |
| 11e          | F   | 5'-GTATAAGCAATATGGAACCTCGA-3'      | 388bp                | 59 °C                 | custom<br>custom |
|              | R   | 5'-TTAAGTTCCTGATTTTGAACA-3'        |                      |                       |                  |
| 11f          | F   | 5'-GACAGCGACTTTCCAGAG-3'           | 704bp                | 60 °C                 | custom<br>custom |
|              | R   | 5'-TGGAACAACCATGGATTAGTC-3'        |                      |                       |                  |
| 11g          | F   | 5'-GGAAGTTAGCACTCTAGGGA-3'         | 423bp                | 57 °C                 | custom<br>custom |
|              | R   | 5'-GCAGTGATATTAAGTCTGTGA-3'        |                      |                       |                  |
| 11h          | F   | 5'-GCAACATTCTCTGCCCACTC-3'         | 436bp                | 58 °C                 | custom<br>custom |
|              | R   | 5'-GGCTAATTGTGCTCACTGT-3'          |                      |                       |                  |
| 11i          | F   | 5'-CTACTTTTTCCCATCAAGTCA-3'        | 377bp                | 59 °C                 | custom<br>custom |
|              | R   | 5'-TCAGGATGCTTACAATTAATTC-3'       |                      |                       |                  |
| 11j          | F   | 5'-CAAAAATTGAATGCTATGCTTAGA-3'     | 377bp                | 61 °C                 | custom<br>custom |
|              | R   | 5'-TCGGTAACCCTGAGCCAAAT-3'         |                      |                       |                  |
| 11k          | F   | 5'-GCAAAAAGCGTCCAGAAAGGA-3'        | 396bp                | 61 °C                 | custom<br>custom |
|              | R   | 5'-TATTTGCAGTCAAGTCTTCCAA-3'       |                      |                       |                  |
| 11l          | F   | 5'-GTAATATTGGCAAAGGCATCT-3'        | 360bp                | 63 °C                 | custom<br>custom |
|              | R   | 5'-TAAAATGTGCTCCCCAAAAGCA-3'       |                      |                       |                  |
| 12           | F   | 5'-GCGTTTATAGTCTGCTTTTACA-3'       | 227bp                | 54 °C                 | bic<br>bic       |
|              | R   | 5'-TGTCAGCAAAACCTAAGAATGT-3'       |                      |                       |                  |
| 13           | F   | 5'-AATGGAAAAGCTTCTCAAAGTA-3'       | 320bp                | 54 °C                 | bic<br>bic       |
|              | R   | 5'-ATGTTGGAGCTAGGTCCTTAC-3'        |                      |                       |                  |
| 14           | F   | 5'-CTAACCTGAATTATCACTATCA-3'       | 312bp                | 54 °C                 | bic<br>bic       |
|              | R   | 5'-GTGTATAAATGCCTGTATGCA-3'        |                      |                       |                  |
| 15           | F   | 5'-CAGACTTCTAGGCTGTCTTGC-3'        | 378bp                | 59 °C                 | bic<br>bic       |
|              | R   | 5'-GTGTTTGTTCGAATACAGCAG-3'        |                      |                       |                  |
| 16           | F   | 5'-AATTCTTAACAGAGACCAGAAC-3'       | 450bp                | 56 °C                 | bic<br>bic       |
|              | R   | 5'-AAAACCTTTTCCAGAATGTTGT-3'       |                      |                       |                  |
| 17           | F   | 5'-AGCTGTGTGCTAGAGGTAAGTCA-3'      | 190bp                | 60 °C                 | bic<br>bic       |
|              | R   | 5'-GTGGTTTTATGCAGCAGATG-3'         |                      |                       |                  |
| 18           | F   | 5'-AGCCTCCCCTAGACTTCCAA-3'         | 319bp                | 60 °C                 | custom<br>custom |
|              | R   | 5'-TAAAGGGAGGAGGGGAGAAA-3'         |                      |                       |                  |
| 19           | F   | 5'-TGTGGCTTTAGAGGGAAGGA-3'         | 261bp                | 60 °C                 | custom<br>custom |
|              | R   | 5'-GGTGCATTGATGGAAGGAAG-3'         |                      |                       |                  |
| 20           | F   | 5'-ATATGACGTGTCTGCTCCAC-3'         | 259bp                | 54 °C                 | bic<br>bic       |
|              | R   | 5'-AGTCTTACAAAATGAAGCGG-3'         |                      |                       |                  |

|       |   |                                   |       |       |        |
|-------|---|-----------------------------------|-------|-------|--------|
| 21    | F | 5'-AAGCTCTTCCTTTTTGAAAGTC-3'      | 298bp | 58 °C | bic    |
|       | R | 5'-GTAGAGAAATAGAATAGCCTCT-3'      |       | 58 °C | bic    |
|       | F | 5'-TCCCATTGAGAGGTCTTGCT-3'        |       |       | bic    |
| 23    | R | 5'-GAGAAGACTTCTGAGGCTAC-3'        | 258bp | 58 °C | custom |
|       | F | 5'-TGAAGTGACAGTCCAGTAGT-3'        |       |       |        |
| 24    | R | 5'-CATTTTAGCCATTCATTCAACAA-3'     | 280bp | 58 °C | bic    |
|       | F | 5'-ATGAATTGACACTAATCTCTGC-3'      |       |       |        |
| BRCA2 |   |                                   |       |       |        |
| 2     | F | 5'-CCAGGAGATGGGACTGAATTAG-3'      | 311bp | 60 °C | bic    |
|       | R | 5'-CTGTGACGTACTGGGTTTTTAGC-3'     |       |       |        |
| 3     | F | 5'-GATCTTTAACTGTTCTGGGTCACA-3'    | 424bp | 59 °C | bic    |
|       | R | 5'-CCCAGCATGACACAATTAATGA-3'      |       |       |        |
| 4     | F | 5'-AAACACTTCCAAAGAATGCAAA-3'      | 399bp | 54 °C | custom |
|       | R | 5'-CCAGCCAATTCAACATCACA-3'        |       |       |        |
| 5/6   | F | 5'-TGTGTTGGCATTTTAAACATCA-3'      | 453bp | 54 °C | bic    |
|       | R | 5'-CAGGGCAAAGGTATAACGCT-3'        |       |       |        |
| 7     | F | 5'-CCTTAATGATCAGGGCATTTC-3'       | 215bp | 59 °C | bic    |
|       | R | 5'-CAACCTCATCTGCTCTTTCTTG-3'      |       |       |        |
| 8     | F | 5'-GCCATATCTTACCACCTTGTGA-3'      | 406bp | 60 °C | bic    |
|       | R | 5'-AGGTTTAGAGACTTTCTCAAAGGC-3'    |       |       |        |
| 9     | F | 5'-ATAACTGAAATCACCAAAAGTG-3'      | 243bp | 62 °C | bic    |
|       | R | 5'-CTGTAGTTCAACTAAACAGAGG-3'      |       |       |        |
| 10a   | F | 5'-CAGGAGAAGGGGTGACTGAC-3'        | 575bp | 61 °C | custom |
|       | R | 5'-AGACCATTACAGGCCAAAG-3'         |       |       |        |
| 10b   | F | 5'-ATTTTCCATGAAGCAAACGC-3'        | 720bp | 57 °C | custom |
|       | R | 5'-AGAATTCTGTGTGGTGGTGG-3'        |       |       |        |
| 10c   | F | 5'-TGGAGAAAATACCCCTATTGC-3'       | 491bp | 58 °C | custom |
|       | R | 5'-AGAATTCTGTGTGGTGGTGG-3'        |       |       |        |
| 10d   | F | 5'-TCACCTAAAGAGACTTTCAATGC-3'     | 442bp | 61 °C | custom |
|       | R | 5'-CAGAAGGAATCGTCATCTATAAAAC-3'   |       |       |        |
| 11a   | F | 5'-CACTGTGCCCAAACTACC-3'          | 462bp | 56 °C | custom |
|       | R | 5'-CTTTCTGGGATTGAAAGTCAG-3'       |       |       |        |
| 11b   | F | 5'-CCTGCAGGAAGGACAGTGTG-3'        | 410bp | 61 °C | custom |
|       | R | 5'-TTCTTGAAGGTGATGCTACTCTC-3'     |       |       |        |
| 11c   | F | 5'-CCCATGGAAAAGAATCAAGATG-3'      | 390bp | 61 °C | custom |
|       | R | 5'-AATTGACACTTGGGTTGCTTG-3'       |       |       |        |
| 11d   | F | 5'-CGAACCCATTTTCAAGAACTC-3'       | 432bp | 58 °C | custom |
|       | R | 5'-GGCTTGCTCAGTTTCTTTTGA-3'       |       |       |        |
| 11e   | F | 5'-CAATTTCAAATCACAGTTTTGG-3'      | 452bp | 56 °C | custom |
|       | R | 5'-CATCTGGTTTTTCAGGCACTTC-3'      |       |       |        |
| 11f   | F | 5'-AACACCTAGCCAAAAGGCAG-3'        | 396bp | 56 °C | custom |
|       | R | 5'-TGCAGAGCTTCAGTAGAAACATTC-3'    |       |       |        |
| 11g   | F | 5'-TTAAACGGAAGTTTGTGTCG-3'        | 427bp | 55 °C | custom |
|       | R | 5'-TTTCTACTGGCAGCAGTATATTG-3'     |       |       |        |
| 11h   | F | 5'-AAATAATATTGAAATGACTACTGGCAC-3' | 451bp | 60 °C | custom |
|       | R | 5'-TTTATTAATGACTCTTTGGCGAC-3'     |       |       |        |
| 11i   | F | 5'-TTTTTGGAAGTTGCGAAAGC-3'        | 455bp | 54 °C | custom |
|       | R | 5'-TCCAAAAGATTCTTTGCAATTT-3'      |       |       |        |
| 11j   | F | 5'-TGAAAGAAAGTGTCCAGTTG-3'        | 419bp | 55 °C | custom |
|       | R | 5'-TGATGTTTTGAGATTTTCAGTTTG-3'    |       |       |        |
| 11k   | F | 5'-AGCTGCCCCAAAGTGTAAG-3'         | 506bp | 59 °C | custom |
|       | R | 5'-CATCAGAATGGTAGGAATAGCTG-3'     |       |       |        |
| 11l   | F | 5'-TCATTGAAAATTCAGCCTTAGC-3'      | 458bp | 55 °C | custom |
|       | R | 5'-AGTCACAAGTTCCTCAACGC-3'        |       |       |        |
| 11m   | F | 5'-ATGCAAAATGCATACCCACAA-3'       | 442bp | 56 °C | custom |
|       | R | 5'-GAAACTTTCTCCAATCCAGACA-3'      |       |       |        |
| 11n   | F | 5'-CAAAAATTTGCCAAACGAAA-3'        | 432bp | 58 °C | custom |
|       | R | 5'-TGAGCTGGTCTGAATGTTTCG-3'       |       |       |        |
| 11o   | F | 5'-TCATCTGCAAATACTTGTGGG-3'       | 440bp | 54 °C | custom |
|       | R | 5'-TGCTCTGGGTTTCTCTTATCAAC-3'     |       |       |        |
| 11p   | F | 5'-CAAGTTTCCATTTTAGAAAGTTC-3'     | 408bp | 56 °C | custom |
|       | R | 5'-AAAAGTTTCAGTTTACCAATTTCC-3'    |       |       |        |
| 11q   | F | 5'-TCAATTTCAACAAGCAAACAACA-3'     | 521bp | 62 °C | custom |
|       | R | 5'-TCAAACCATACTCCCCAAA-3'         |       |       |        |
| 12    | F | 5'-AGTGGTGTTTTAAAGTGGTCAAAA-3'    | 388bp | 55 °C | bic    |
|       | R | 5'-GGATCCACCTGAGGTCAGAATA-3'      |       |       |        |

|     |   |                                   |       |       |        |
|-----|---|-----------------------------------|-------|-------|--------|
| 13  | F | 5'-TGCTGATTTCTGTTGTATGCTTG-3'     | 546bp | 61 °C | custom |
|     | R | 5'-TCCTCTCAACCTTAGTACTTCATCC-3'   |       |       | custom |
| 14  | F | 5'-ACCATGTAGCAAATGAGGGTCT-3'      | 557bp | 62 °C | bic    |
|     | R | 5'-GCAAAAATTCATCACACAAATTGTC-3'   |       |       | bic    |
| 15  | F | 5'-GGCCAGGGTGTGCTTTTT-3'          | 314bp | 54 °C | bic    |
|     | R | 5'-AGGATACTAGTTAATGAAATA-3'       |       |       | bic    |
| 16  | F | 5'-TTTGGTAAATTCAGTTTTGGTTTG-3'    | 350bp | 59 °C | bic    |
|     | R | 5'-GAGAAGAAAGAGGGATGAGGG-3'       |       |       | custom |
| 17  | F | 5'-CACCATGCTCAGCAATGAAG-3'        | 485bp | 57 °C | custom |
|     | R | 5'-CACTGACAACCTGGCTTGTGC-3'       |       |       | custom |
| 18a | F | 5'-TGATCCACTATTTGGGGATTG-3'       | 466bp | 56 °C | custom |
|     | R | 5'-GAGGGGAGGATCTAACTGGG-3'        |       |       | custom |
| 18b | F | 5'-ATGGAAAGGGATGACACAGC-3'        | 502bp | 62 °C | custom |
|     | R | 5'-CTCAAGAAAGATCTCTGGACCTC-3'     |       |       | custom |
| 19  | F | 5'-AAGTGAATATTTTAAGGCAGTT-3'      | 296bp | 56 °C | bic    |
|     | R | 5'-TATATGGTAAAGTTTCAAGAAT-3'      |       |       | bic    |
| 20  | F | 5'-CAAGTAGCTGAGCCACCACA-3'        | 623bp | 56 °C | custom |
|     | R | 5'-ACAAAAATGCAAAAGCCACA-3'        |       |       | custom |
| 21  | F | 5'-TGCTTGGTTCTTTAGTTTTAGTTGC-3'   | 261bp | 60 °C | custom |
|     | R | 5'-GAGTCTAAAACAGCTTCTCACCTTG-3'   |       |       | custom |
| 22  | F | 5'-AACCACACCCTTAAGATGAGC-3'       | 455bp | 61 °C | bic    |
|     | R | 5'-GGGCATTAGTAGTGGATTTTGC-3'      |       |       | bic    |
| 23  | F | 5'-GCAAAATCCACTACTAATGCCC-3'      | 350bp | 57 °C | custom |
|     | R | 5'-TGGAGATTCCATAAACTAACAAGC-3'    |       |       | custom |
| 24  | F | 5'-CCGGTACAAAACCTTTCATTG-3'       | 329bp | 58 °C | custom |
|     | R | 5'-TGCCAACCTGGTAGCTCCAAC-3'       |       |       | custom |
| 25  | F | 5'-TGCATCTTAAAATTCATCTAACACATC-3' | 383bp | 62 °C | custom |
|     | R | 5'-AAGCTATTTCTTGATACTGGACTG-3'    |       |       | custom |
| 26  | F | 5'-TGACAATTGGTATCACATTTAGGG-3'    | 421bp | 59 °C | custom |
|     | R | 5'-CAGGAGCCACATAACAACCA-3'        |       |       | custom |
| 27a | F | 5'-TAGGGGAGGGAGACTGTGTG-3'        | 383bp | 59 °C | custom |
|     | R | 5'-ACTCCTTGGTGGCTGAAATG-3'        |       |       | custom |
| 27b | F | 5'-GAAAGAGATTGATGACCAAAAAGAA-3'   | 401bp | 61 °C | custom |
|     | R | 5'-GAGATGTAGTACAACGTCGTTTCAG-3'   |       |       | custom |
| 27c | F | 5'-CTGAATTCTCCTCAGATGACTCC-3'     | 447bp | 61 °C | custom |
|     | R | 5'-AAACGCTGAGGTAAATTTGAAAC-3'     |       |       | custom |
| 27d | F | 5'-GGCCAGTACGGAAGAATGTG-3'        | 556bp | 62 °C | custom |
|     | R | 5'-CCTCATTCCATTTAATGACACAA-3'     |       |       | custom |
