# Supplementary material for: Spectrum and frequencies of BRCA1/2 mutations in Bulgarian high risk breast cancer patients
Source: Springer Nature journal article supplement (doi:10.1186/s12885-015-1516-2), 2015-07-16

# BC134

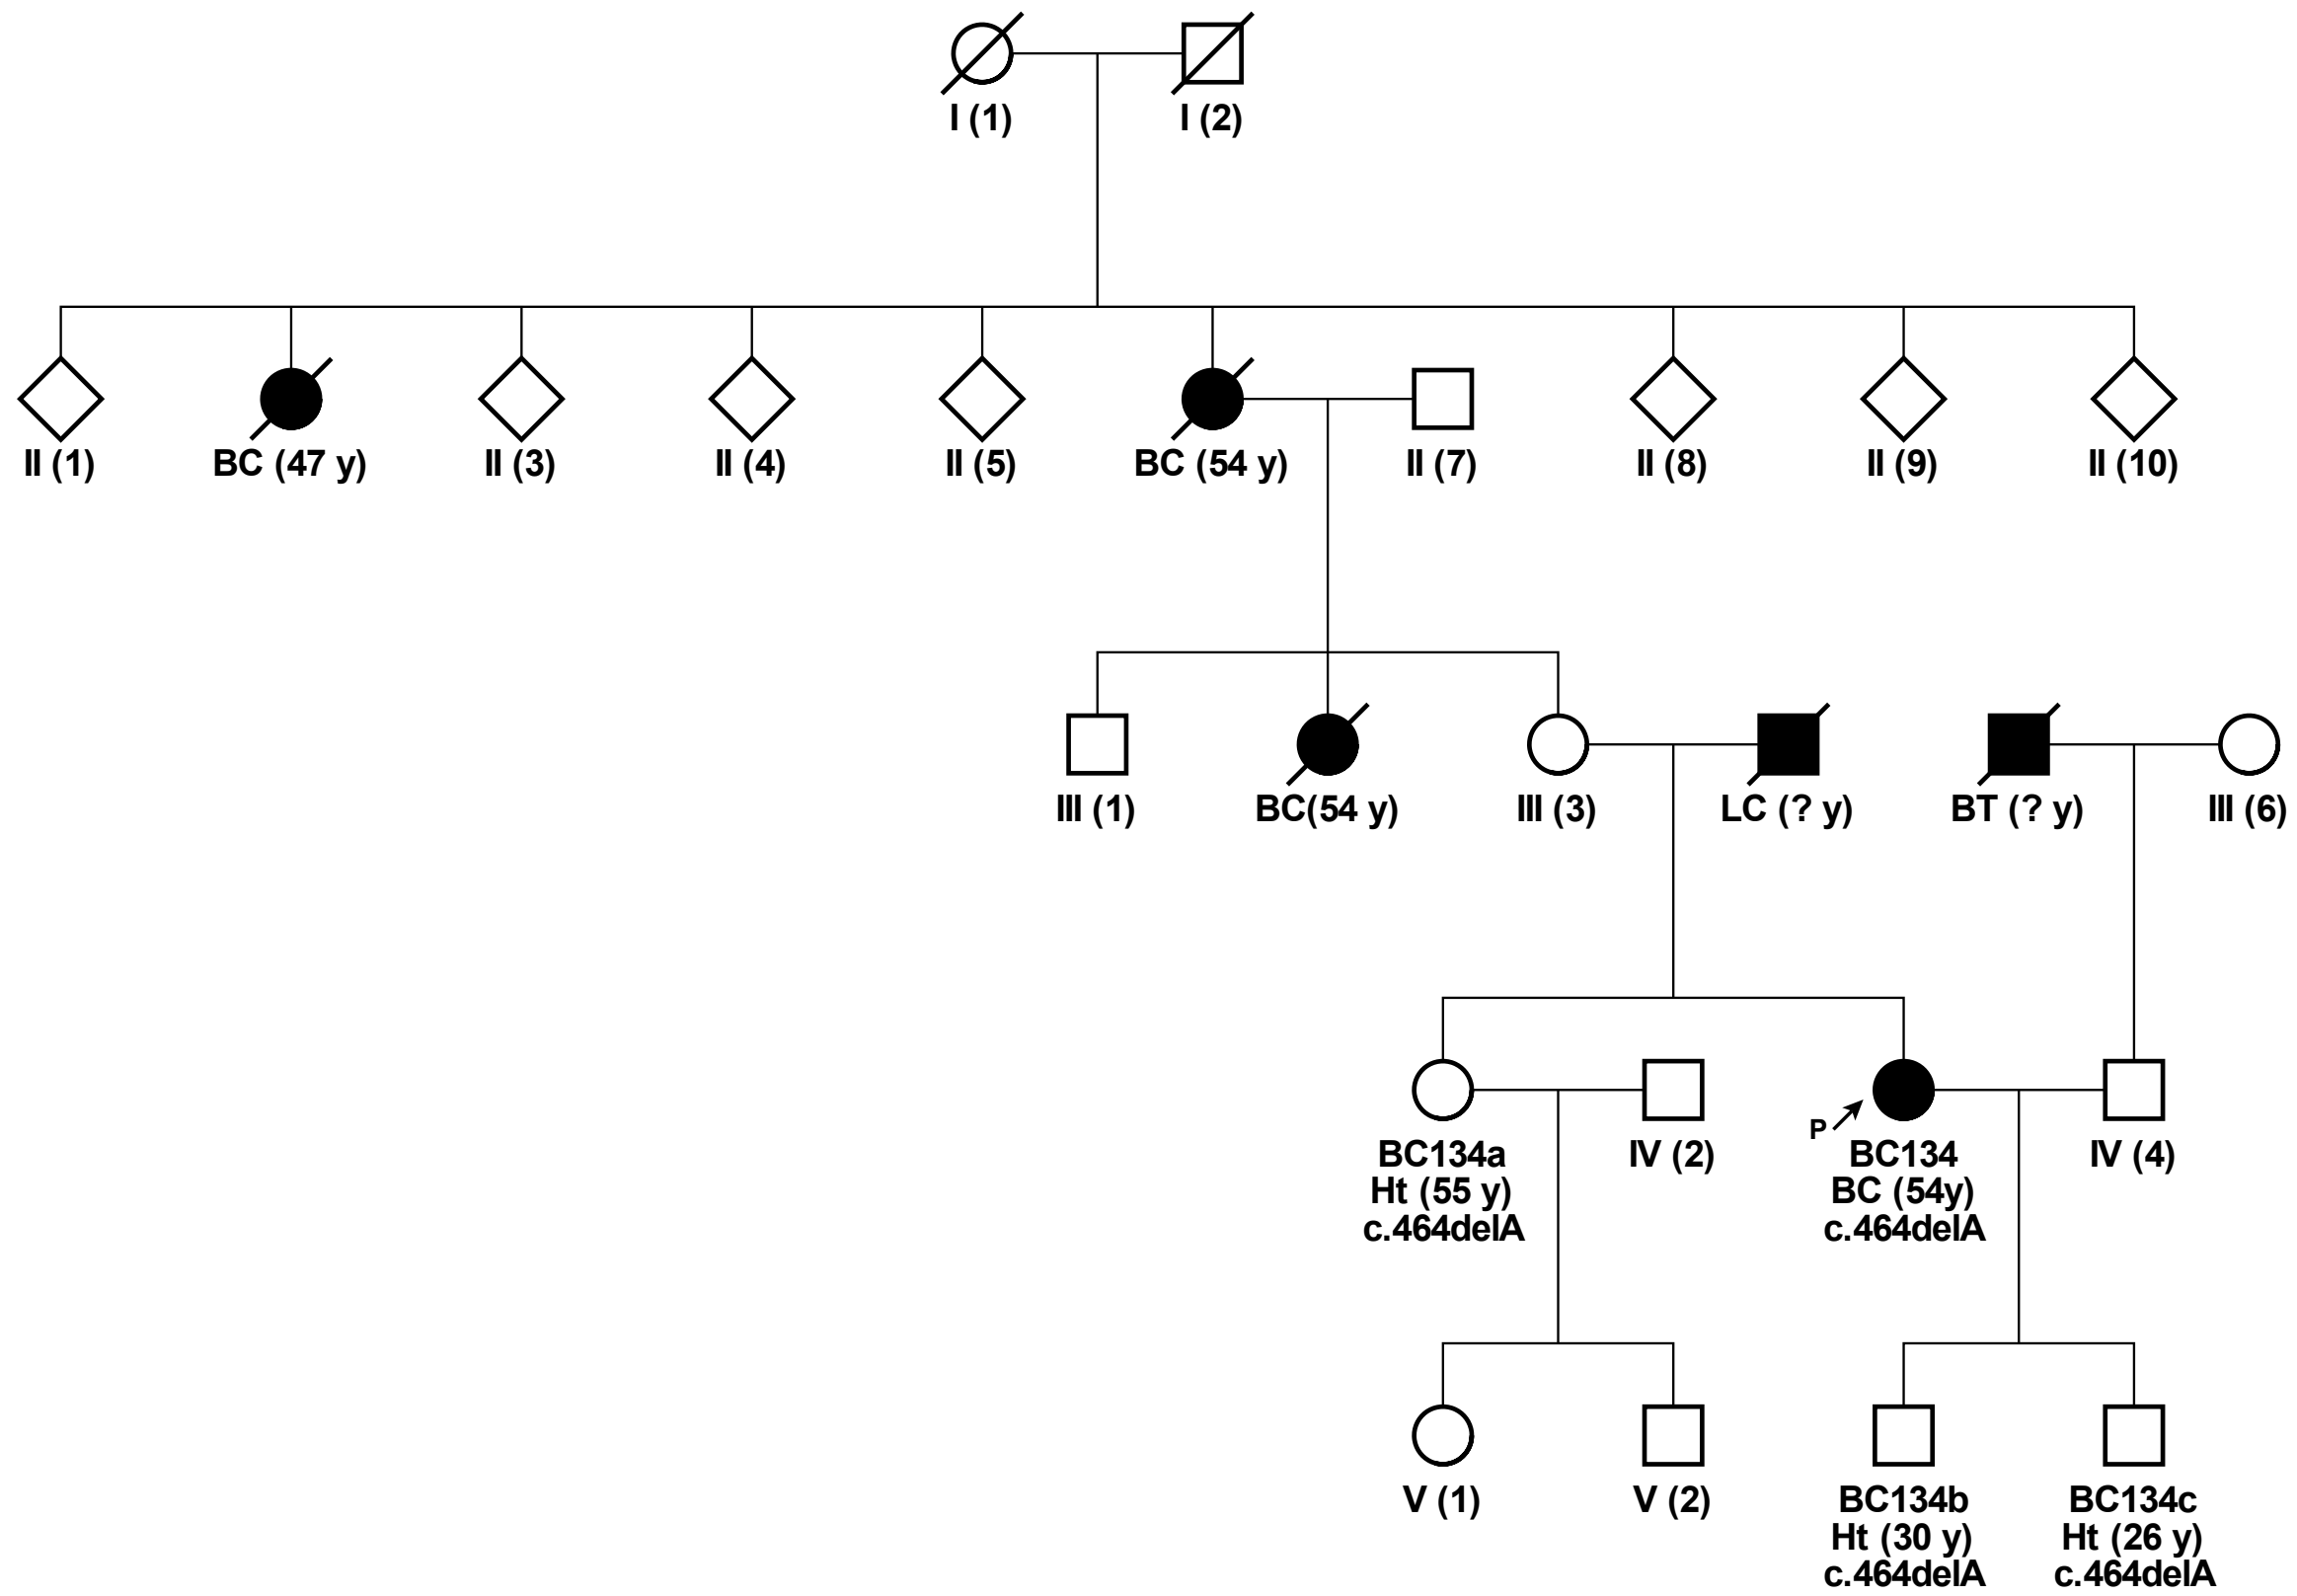

Supplement: MOESM3 [file 9744814]
